# Supplementary material
Source: PubMed Central journal article supplement (PMC8811937)
Supplement: ao1c05149_si_001.pdf [file ao1c05149_si_001.pdf]

Preparation and characterization of ACE2 receptor inhibitor loaded chitosan hydrogels for nasal formulation to reduce the risk of COVID-19 viral infection

Barbara Vörös-Horváth<sup>1</sup>, Pavo Živković<sup>2</sup>, Krisztina Bánfai<sup>3</sup>, Judit Bóvári-Biri<sup>3</sup>, Judit Pongrácz<sup>3</sup>, Gábor Bálint<sup>1</sup>, Szilárd Pál<sup>1</sup>, Aleksandar Széchenyi<sup>1,2\*1</sup> Institute of Pharmaceutical Technology and Biopharmacy, University of Pécs, Faculty of Pharmacy, Rókus u. 2., H-7624 Pécs, Hungary, [horvath.barbara@gytk.pte.hu](mailto:horvath.barbara@gytk.pte.hu), [pal.szilard@gytk.pte.hu](mailto:pal.szilard@gytk.pte.hu), [szechenyi.aleksandar@gytk.pte.hu](mailto:szechenyi.aleksandar@gytk.pte.hu)

<sup>2</sup> Department of Chemistry, Josip Juraj Strossmayer University of Osijek, Ulica cara Hadrijana 8/A, HR-31000 Osijek, Croatia; [pzivkovic@kemija.unios.hr](mailto:pzivkovic@kemija.unios.hr)

<sup>3</sup> Department of Pharmaceutical Biotechnology, University of Pécs, Faculty of Pharmacy, Rókus u. 2. H-7624 Pécs, Hungary; [banfai.krisztina@pte.hu](mailto:banfai.krisztina@pte.hu), [bovari.judit@pte.hu](mailto:bovari.judit@pte.hu), [pongacz.e.judit@pte.hu](mailto:pongacz.e.judit@pte.hu)

\*corresponding author. E-mail: [szechenyi.aleksandar@gytk.pte.hu](mailto:szechenyi.aleksandar@gytk.pte.hu) Phone: +36-70-3814462

Authors declare no conflict of interest.

The Supporting information consist of 12 pages, and contains 6 chapters with 14 figures and 4 tables.

## 1. Determination of chitosan solubility

The influence of pH and chitosan concentration on chitosan solubility were examined in both malic acid and glutaric acid solutions. In case of examine the influence of pH on solubility, an initial solution was prepared by weight 1.0 m/m% chitosan in 5.0 m/V% dicarboxylic acid solutions, and diluted until the solution turned into a suspension. In case of examine the influence of chitosan concentration on chitosan solubility, an initial solution was prepared by weight 0.25 m/m% chitosan in 2.0 m/V% dicarboxylic acid solution, and added chitosan until the solution turned into a suspension.

The light scattering of solutions were determined visually and with instrumental measurement of scattered light intensity (Zetasizer NanoS, Malvern Panalytical Ltd. UK). The examinations were performed at ambient temperature (25°C). The measurements were carried out in autocorrelation mode, and the following parameters were constant: scattering angle 173°, attenuator 7 and its factor 0.0146, measurement position 0.46 mm.

The result shows, that in case of malic acid the chitosan can be dissolved under 3.22 pH value, which means more than 0.025 m/V% acid concentration. At 2.0 m/V% malic acid concentration (pH=2.27) the chitosan can be dissolved until 2.75 m/m% concentration. In glutaric acid the chitosan can be dissolved under 3.59 pH value (0.05 m/V% acid concentration). At 2.0 m/V% glutaric acid concentration (pH=2.79) the chitosan can be dissolved until 3.0 m/m% concentration.

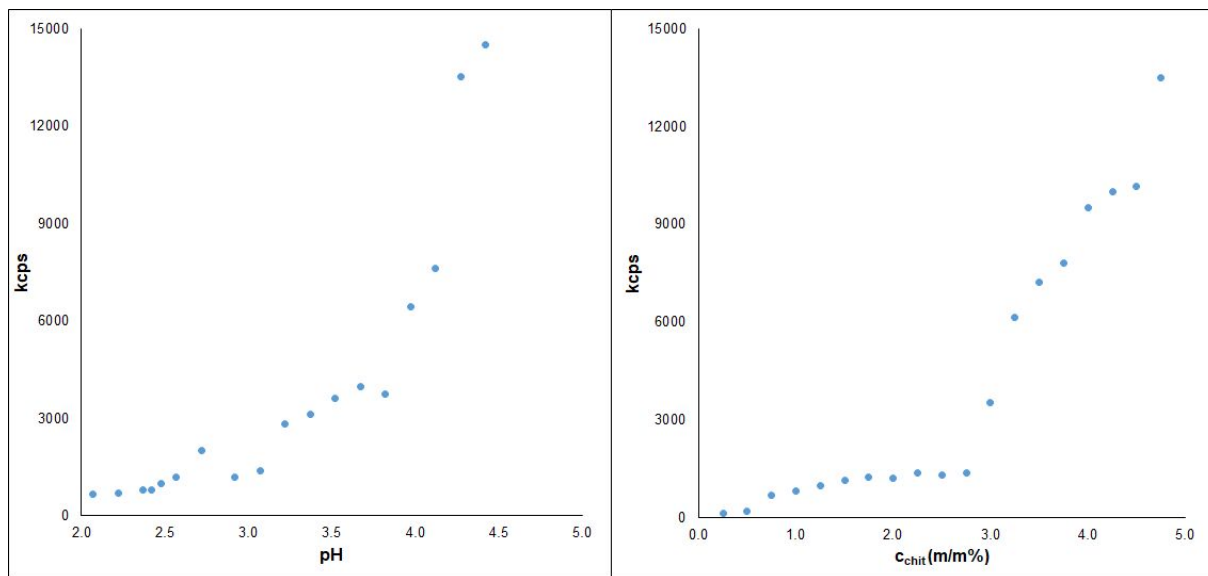

**S1. Figure: Determination of chitosan solubility in malic acid with light scattering measurements.**

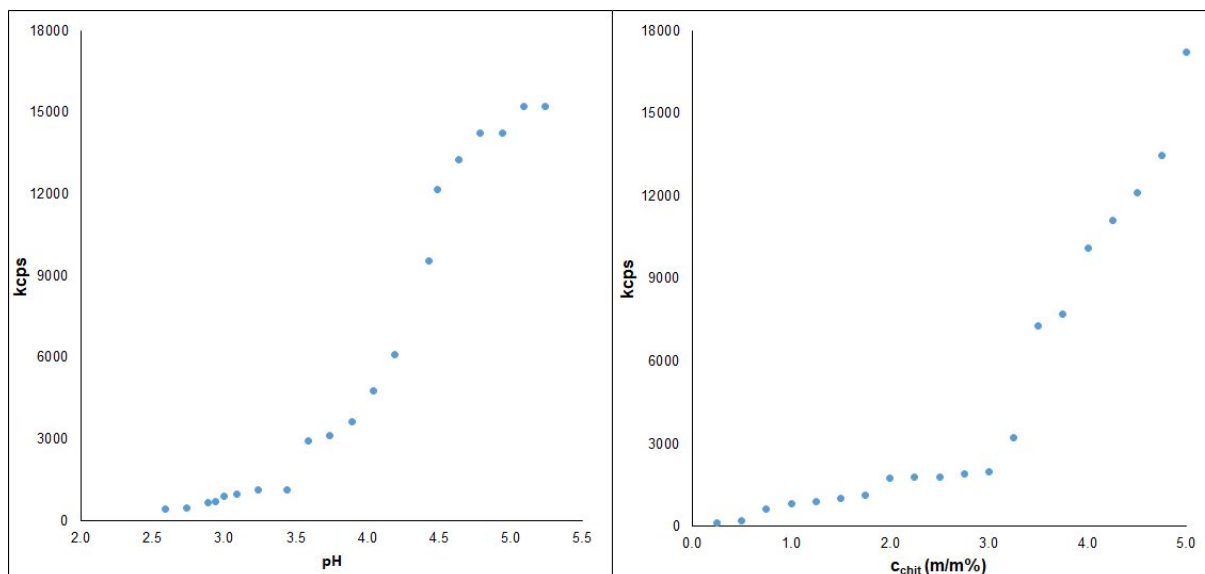

**S2. Figure: Determination of chitosan solubility in glutaric acid with light scattering measurements.**

2. Results of calculation of cross-linking degree (CR) and cross-linking efficacy (CE)

| Sample   | n <sub>A</sub> (mol/g) | CR (%) | CE (%) | Sample  | n <sub>A</sub> (mol/g) | CR (%) | CE (%) |
|----------|------------------------|--------|--------|---------|------------------------|--------|--------|
| Chitosan | 5.25·10 <sup>-3</sup>  | -      | -      | GA 253  | 4.28·10 <sup>-3</sup>  | 18.57  | 3.22   |
| MA 253   | 4.23·10 <sup>-3</sup>  | 19.52  | 3.44   | GA 258  | 4.13·10 <sup>-3</sup>  | 21.43  | 3.72   |
| MA 258   | 4.13·10 <sup>-3</sup>  | 21.43  | 3.77   | GA 2524 | 4.00·10 <sup>-3</sup>  | 23.81  | 4.13   |
| MA 2524  | 4.03·10 <sup>-3</sup>  | 23.33  | 4.11   | GA 403  | 3.70·10 <sup>-3</sup>  | 29.52  | 5.12   |
| MA 403   | 4.08·10 <sup>-3</sup>  | 22.38  | 3.94   | GA 408  | 3.50·10 <sup>-3</sup>  | 33.33  | 5.78   |
| MA 408   | 3.88·10 <sup>-3</sup>  | 26.19  | 4.61   | GA 4024 | 3.43·10 <sup>-3</sup>  | 34.76  | 6.03   |
| MA 4024  | 3.83·10 <sup>-3</sup>  | 27.14  | 4.78   | GA 503  | 2.50·10 <sup>-3</sup>  | 52.38  | 9.08   |
| MA 503   | 3.63·10 <sup>-3</sup>  | 30.95  | 9.22   | GA 508  | 2.38·10 <sup>-3</sup>  | 54.76  | 9.50   |
| MA 508   | 3.50·10 <sup>-3</sup>  | 33.33  | 9.64   | GA 5024 | 2.18·10 <sup>-3</sup>  | 58.57  | 10.16  |
| MA 5024  | 3.38·10 <sup>-3</sup>  | 35.71  | 10.31  |         |                        |        |        |

**S1 Table. Results of determination of number of free amino groups and the cross-linking degree of chitosan and hydrogel samples with conductometric titration. n<sub>A</sub>: x mol of free amino group per 1 g chitosan/chitosan hydrogel. CR: cross-linking degree (%). CE: cross-linking efficacy.**

### 3. Determination of flow properties

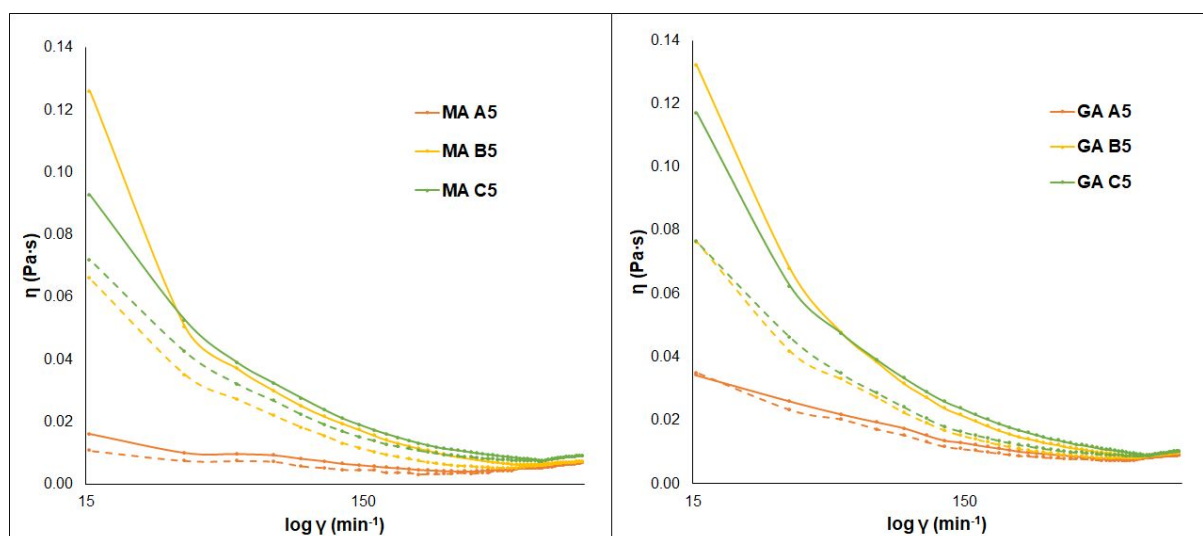

**S3 Figure. Viscosity curves of chitosan hydrogels, cross-linked with malic and glutaric acid at different reaction temperatures.** The continuous lines remark the upward curves, and the dotted lines remark the downward curves.

| Sample             | Bingham plasticity parameters |                      |        | Hysteresis area (Pa/s·ml) | Apparent viscosity (Pa·s) |
|--------------------|-------------------------------|----------------------|--------|---------------------------|---------------------------|
|                    | $\tau_B$ (Pa)                 | $\eta_B$ (Pa·s)      | $R^2$  |                           |                           |
| <b>MA 298.15</b>   |                               |                      |        |                           |                           |
| MA 250             | 0.010                         | $2.09 \cdot 10^{-3}$ | 0.9900 | 16.744                    | $4.44 \cdot 10^{-3}$      |
| MA 251.5           | 0.018                         | $2.07 \cdot 10^{-3}$ | 0.9822 | 20.301                    | $4.55 \cdot 10^{-3}$      |
| MA 253             | 0.077                         | $2.41 \cdot 10^{-3}$ | 0.9868 | 25.606                    | $4.08 \cdot 10^{-3}$      |
| MA 25.45           | 0.143                         | $3.04 \cdot 10^{-3}$ | 0.9715 | 26.204                    | $4.57 \cdot 10^{-3}$      |
| MA 256             | 0.148                         | $4.29 \cdot 10^{-3}$ | 0.9281 | 28.000                    | $5.21 \cdot 10^{-3}$      |
| MA 258             | 0.997                         | $5.01 \cdot 10^{-3}$ | 0.9878 | 34.484                    | $6.85 \cdot 10^{-3}$      |
| MA 2524            | 1.462                         | $5.51 \cdot 10^{-3}$ | 0.9664 | 54.874                    | $7.68 \cdot 10^{-3}$      |
| <b>MA 313.15 K</b> |                               |                      |        |                           |                           |
| MA 401.5           | 0.044                         | $2.77 \cdot 10^{-3}$ | 0.9609 | 23.779                    | $5.03 \cdot 10^{-3}$      |
| MA 403             | 0.053                         | $3.90 \cdot 10^{-3}$ | 0.9695 | 25.698                    | $5.99 \cdot 10^{-3}$      |
| MA 404.5           | 0.730                         | $5.43 \cdot 10^{-3}$ | 0.9916 | 35.989                    | $7.98 \cdot 10^{-3}$      |
| MA 406             | 0.747                         | $6.01 \cdot 10^{-3}$ | 0.9325 | 54.885                    | $8.54 \cdot 10^{-3}$      |
| MA 408             | 1.764                         | $6.11 \cdot 10^{-3}$ | 0.9619 | 59.790                    | $9.14 \cdot 10^{-3}$      |
| MA 4024            | 2.189                         | $6.43 \cdot 10^{-3}$ | 0.9422 | 70.833                    | $9.88 \cdot 10^{-3}$      |
| <b>MA 323.15 K</b> |                               |                      |        |                           |                           |
| MA 50.15           | 0.491                         | $3.80 \cdot 10^{-3}$ | 0.9798 | 22.456                    | $6.00 \cdot 10^{-3}$      |
| MA 503             | 0.617                         | $4.06 \cdot 10^{-3}$ | 0.9297 | 34.632                    | $6.22 \cdot 10^{-3}$      |
| MA 504.5           | 1.174                         | $4.25 \cdot 10^{-3}$ | 0.9516 | 45.619                    | $6.78 \cdot 10^{-3}$      |
| MA 506             | 1.175                         | $4.92 \cdot 10^{-3}$ | 0.9384 | 73.468                    | $8.27 \cdot 10^{-3}$      |
| MA 508             | 1.480                         | $5.39 \cdot 10^{-3}$ | 0.9876 | 85.343                    | $8.72 \cdot 10^{-3}$      |
| MA 5024            | 2.338                         | $3.43 \cdot 10^{-2}$ | 0.9468 | 113.316                   | $8.67 \cdot 10^{-3}$      |

**S2 Table. Rheological parameters of chitosan hydrogels cross-linked with malic acid at different temperatures.** Chitosan hydrogels show Bingham plastic behaviour. The  $\tau_B$  is the yield stress needed to flow (Pa),  $\eta_B$  is Bingham viscosity (Pa·s).  $R^2$  provide information about

the fit of Bingham plasticity mathematical model. Hysteresis area values were calculated from the area of hysteresis loop.

| Sample             | Bingham plasticity parameters |                      |        | Hysteresis area (Pa/s·ml) | Apparent viscosity (Pa·s) |
|--------------------|-------------------------------|----------------------|--------|---------------------------|---------------------------|
|                    | $\tau_B$ (Pa)                 | $\eta_B$ (Pa·s)      | $R^2$  |                           |                           |
| <b>GA 298.15 K</b> |                               |                      |        |                           |                           |
| GA 250             | 0.095                         | $6.14 \cdot 10^{-3}$ | 0.9813 | 14.813                    | $5.39 \cdot 10^{-3}$      |
| GA 251.5           | 0.225                         | $6.30 \cdot 10^{-3}$ | 0.9598 | 19.463                    | $7.96 \cdot 10^{-3}$      |
| GA 253             | 0.582                         | $6.94 \cdot 10^{-3}$ | 0.9691 | 26.439                    | $8.59 \cdot 10^{-3}$      |
| GA 254.5           | 0.708                         | $7.11 \cdot 10^{-3}$ | 0.9519 | 26.820                    | $8.65 \cdot 10^{-3}$      |
| GA 256             | 0.721                         | $7.13 \cdot 10^{-3}$ | 0.9570 | 34.859                    | $8.95 \cdot 10^{-3}$      |
| GA 258             | 1.234                         | $7.74 \cdot 10^{-3}$ | 0.9788 | 39.252                    | $9.34 \cdot 10^{-3}$      |
| GA 2524            | 1.521                         | $8.55 \cdot 10^{-3}$ | 0.9820 | 60.820                    | $9.38 \cdot 10^{-3}$      |
| <b>GA 313.15 K</b> |                               |                      |        |                           |                           |
| GA 401.5           | 0.502                         | $6.11 \cdot 10^{-3}$ | 0.9511 | 55.463                    | $8.32 \cdot 10^{-3}$      |
| GA 403             | 0.913                         | $6.11 \cdot 10^{-3}$ | 0.9240 | 70.595                    | $8.92 \cdot 10^{-3}$      |
| GA 404.5           | 1.194                         | $6.35 \cdot 10^{-3}$ | 0.9790 | 76.055                    | $8.69 \cdot 10^{-3}$      |
| GA 406             | 1.503                         | $6.55 \cdot 10^{-3}$ | 0.9691 | 77.651                    | $9.24 \cdot 10^{-3}$      |
| GA 408             | 1.628                         | $6.60 \cdot 10^{-3}$ | 0.9632 | 91.418                    | $9.83 \cdot 10^{-3}$      |
| GA 4024            | 2.002                         | $7.58 \cdot 10^{-3}$ | 0.9693 | 98.155                    | $1.03 \cdot 10^{-2}$      |
| <b>GA 323.15 K</b> |                               |                      |        |                           |                           |
| GA 501.5           | 1.156                         | $6.59 \cdot 10^{-3}$ | 0.9815 | 52.319                    | $8.69 \cdot 10^{-3}$      |
| GA 503             | 1.406                         | $7.11 \cdot 10^{-3}$ | 0.9743 | 68.531                    | $9.48 \cdot 10^{-3}$      |
| GA 504.5           | 1.468                         | $7.41 \cdot 10^{-3}$ | 0.9571 | 73.308                    | $1.01 \cdot 10^{-2}$      |
| GA 506             | 1.561                         | $7.96 \cdot 10^{-3}$ | 0.9718 | 84.826                    | $1.04 \cdot 10^{-2}$      |
| GA 508             | 1.874                         | $8.05 \cdot 10^{-3}$ | 0.9532 | 89.969                    | $1.07 \cdot 10^{-2}$      |
| GA 5024            | 2.390                         | $9.12 \cdot 10^{-3}$ | 0.9693 | 117.505                   | $1.12 \cdot 10^{-2}$      |

**S3 Table. Rheological parameters of chitosan hydrogels cross-linked with glutaric acid at different temperatures.** Chitosan hydrogels show Bingham plastic behaviour. The  $\tau_B$  is the yield stress needed to flow (Pa),  $\eta_B$  is Bingham viscosity (Pa·s).  $R^2$  provide information about the fit of Bingham plasticity mathematical model. Hysteresis area values were calculated from the area of hysteresis loop.

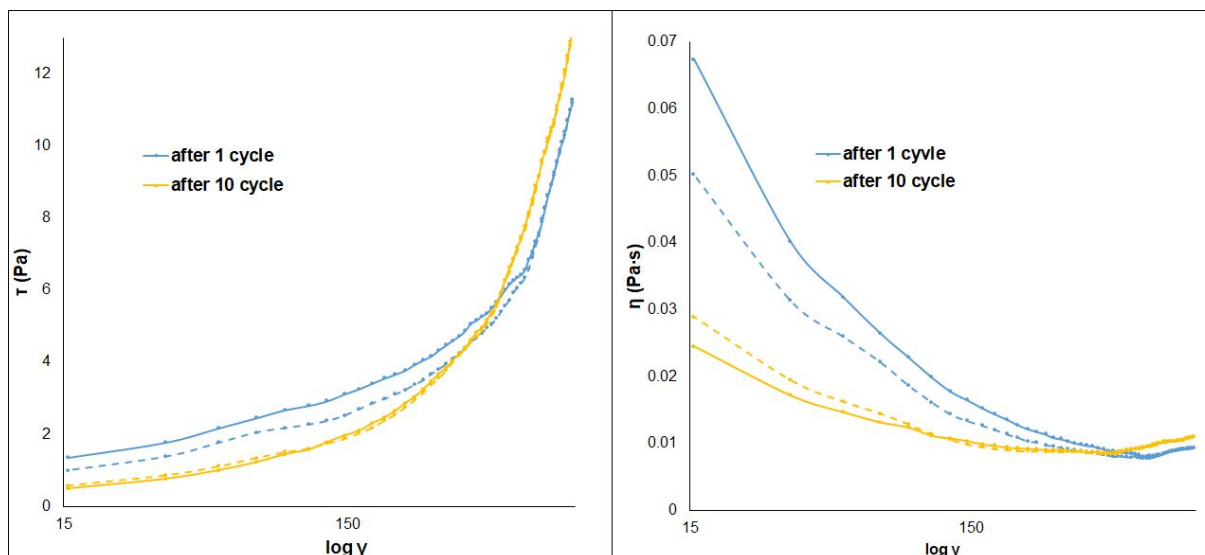

**S4 Figure. Flow (A) and viscosity (B) curves of GA 2524 hydrogel sample after 1<sup>st</sup> and 10<sup>th</sup> measurement cycle. The continuous lines remark the upward curves, and the dotted lines remark the downward curves.**

#### 4. DSC measurements of hydrogels

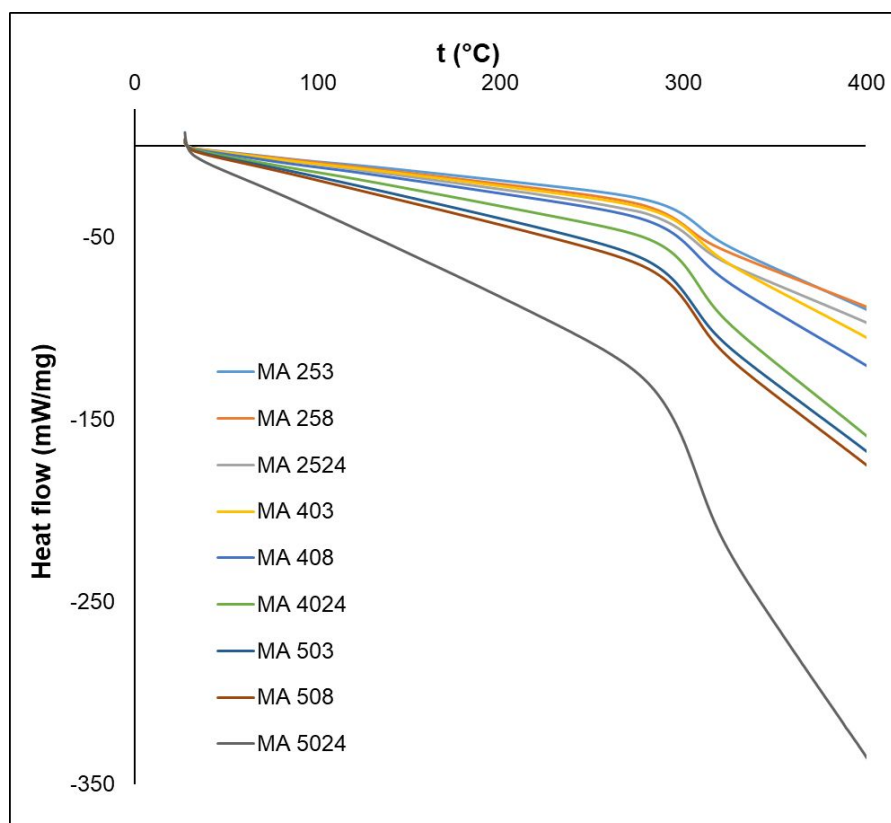

**S5. Figure: DSC curve of hydrogels cross-linked with malic acid.**

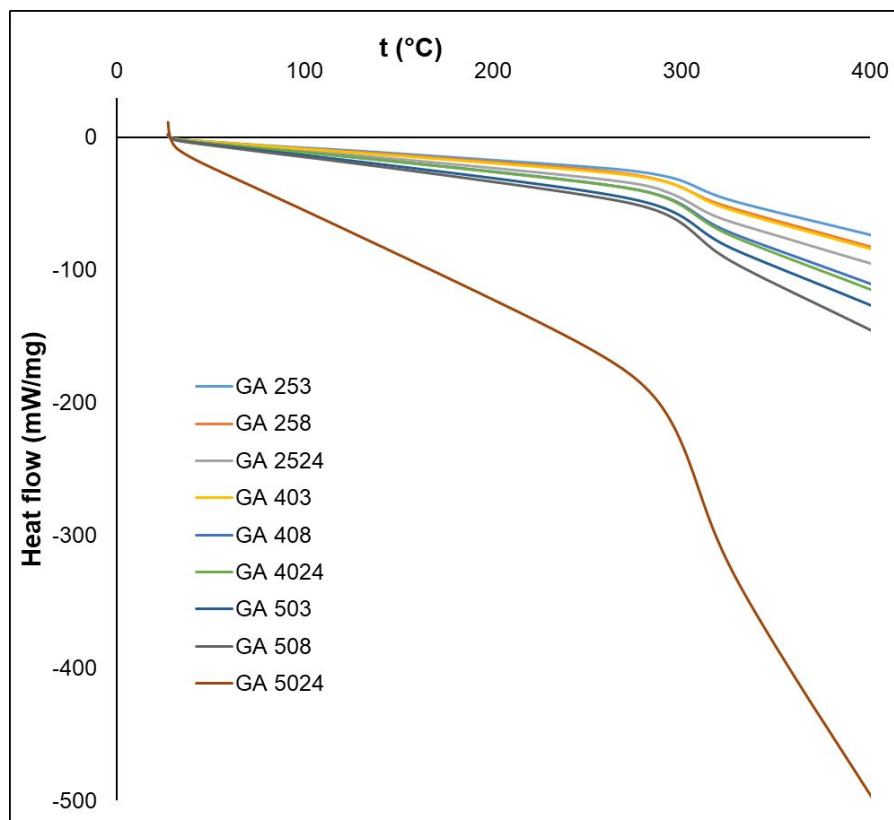

S6. Figure: DSC curve of hydrogels cross-linked with glutaric acid.

5. Characterization of API adsorption of hydrogels

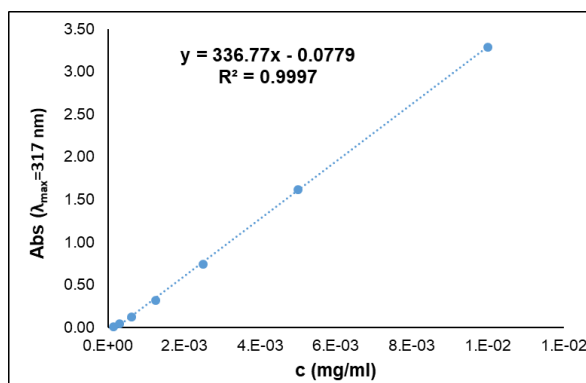

**S7 Figure: Calibration curve of baicalin.**

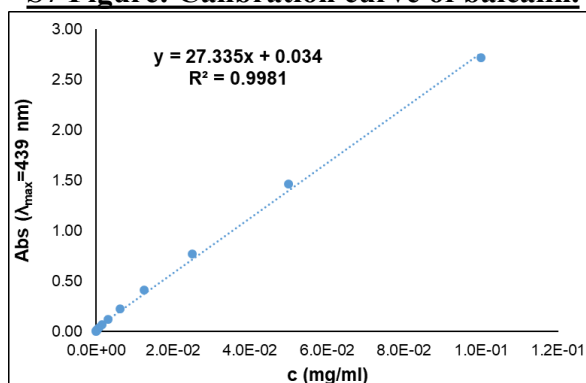

**S8 Figure: Calibration curve of emodin.**

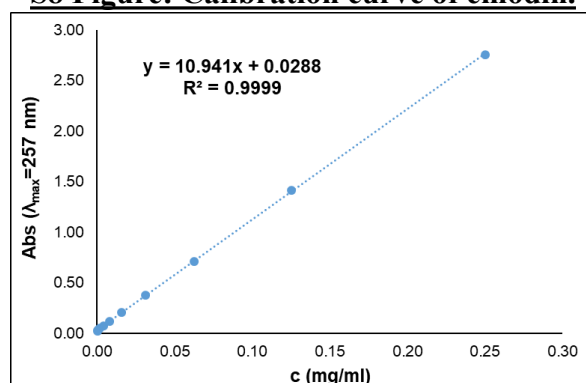

**S9 Figure: Calibration curve of glycyrrhizic acid.**

| API               | Linearity | LOD (mg/ml) | LOQ (mg/ml) |
|-------------------|-----------|-------------|-------------|
| baicalin          | 0.997     | 0.000106    | 0.000321    |
| emodin            | 0.9981    | 0.00236     | 0.00715     |
| glycyrrhizic acid | 0.9999    | 0.00126     | 0.00367     |

**S4 Table: General analytical parameters of APIs.**



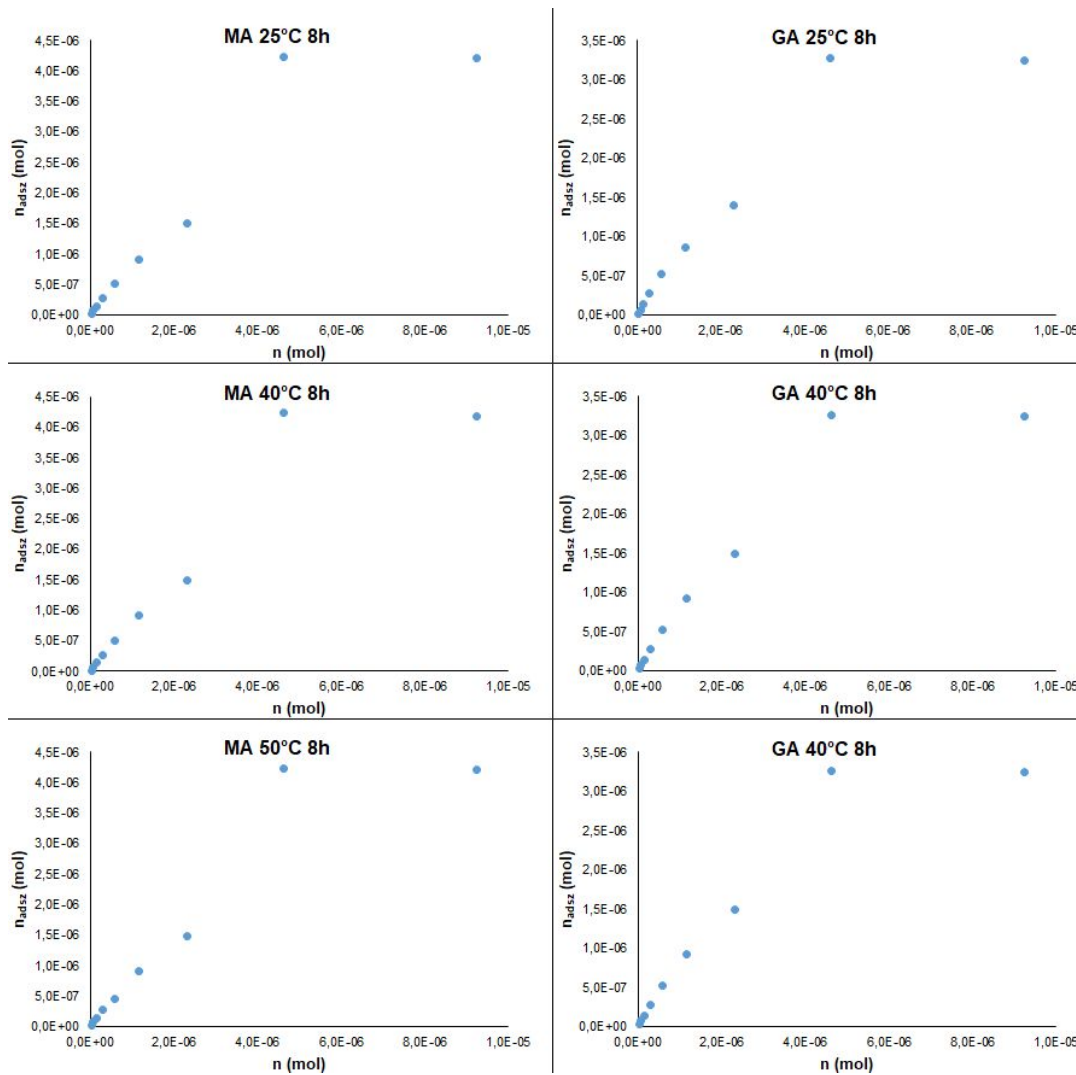

**S10. Figure: Adsorption isotherm of chitosan hydrogels with emodin.** MA: hydrogels cross-linked with malic acid. GA: hydrogels cross-linked with glutaric acid.

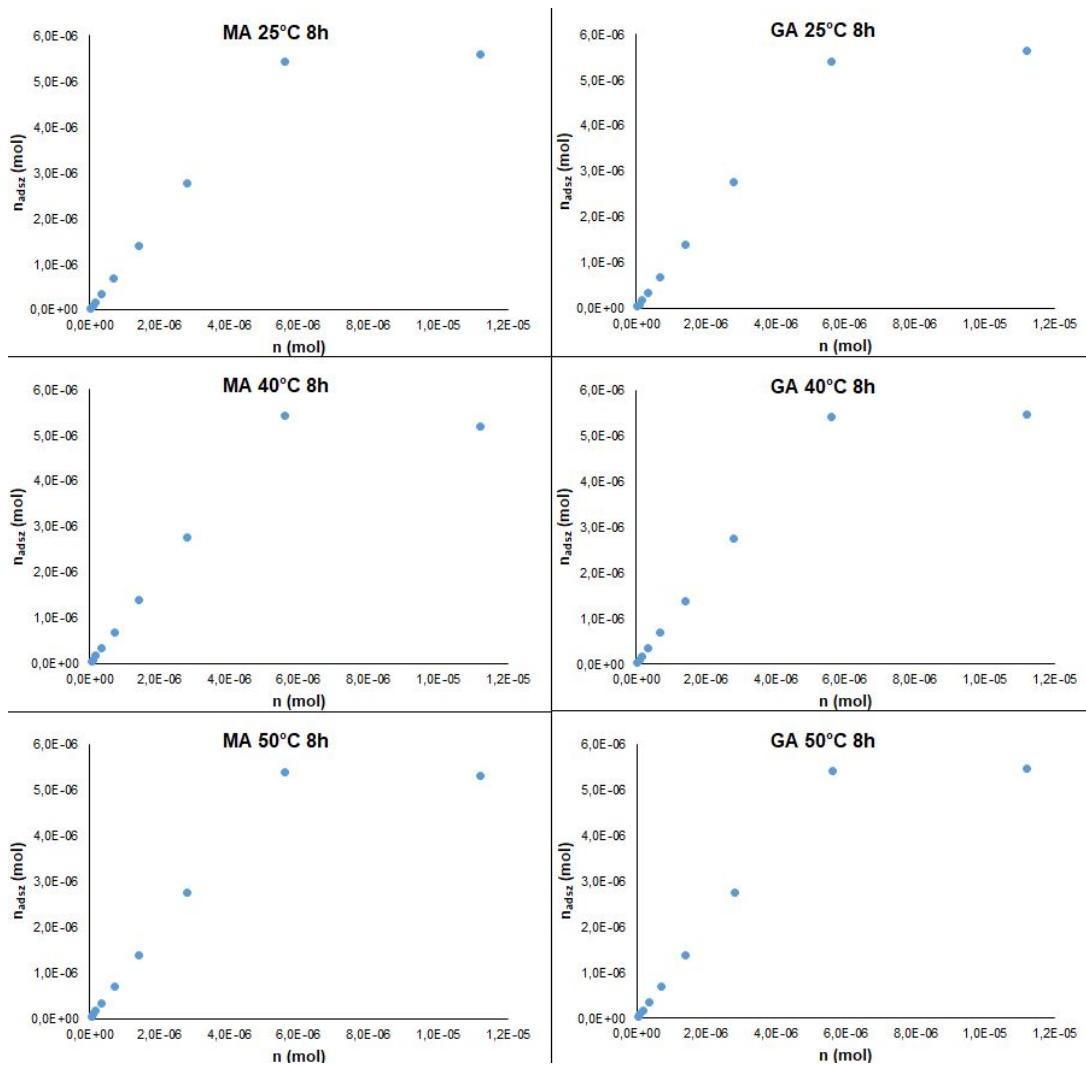

**S11. Figure: Adsorption isotherm of chitosan hydrogels with baicalin.** MA: hydrogels cross-linked with malic acid. GA: hydrogels cross-linked with glutaric acid.

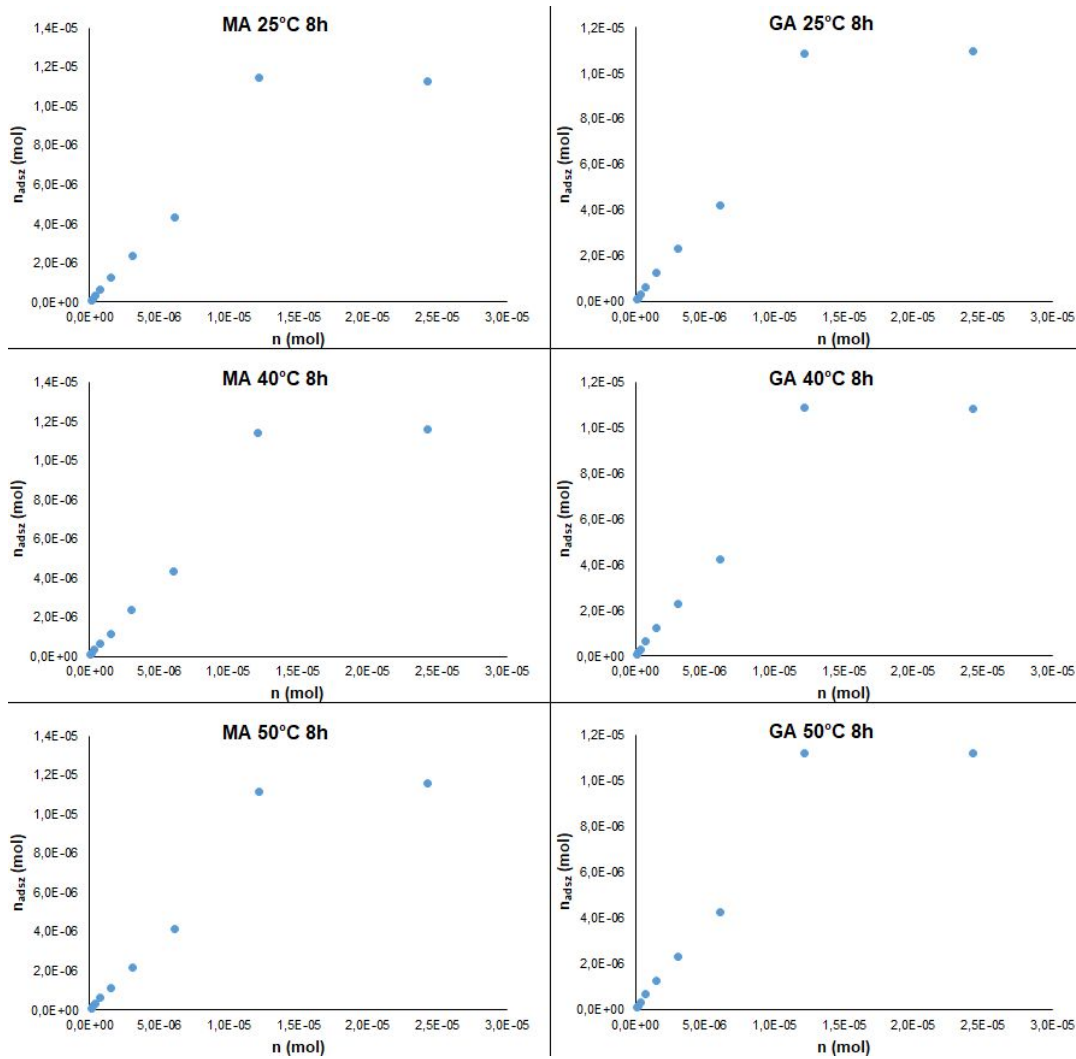

**S12. Figure: Adsorption isotherm of chitosan hydrogels with glycyrrhizic acid. MA: hydrogels cross-linked with malic acid. GA: hydrogels cross-linked with glutaric acid.**

6. Results of cytotoxicity measurements of hydrogels

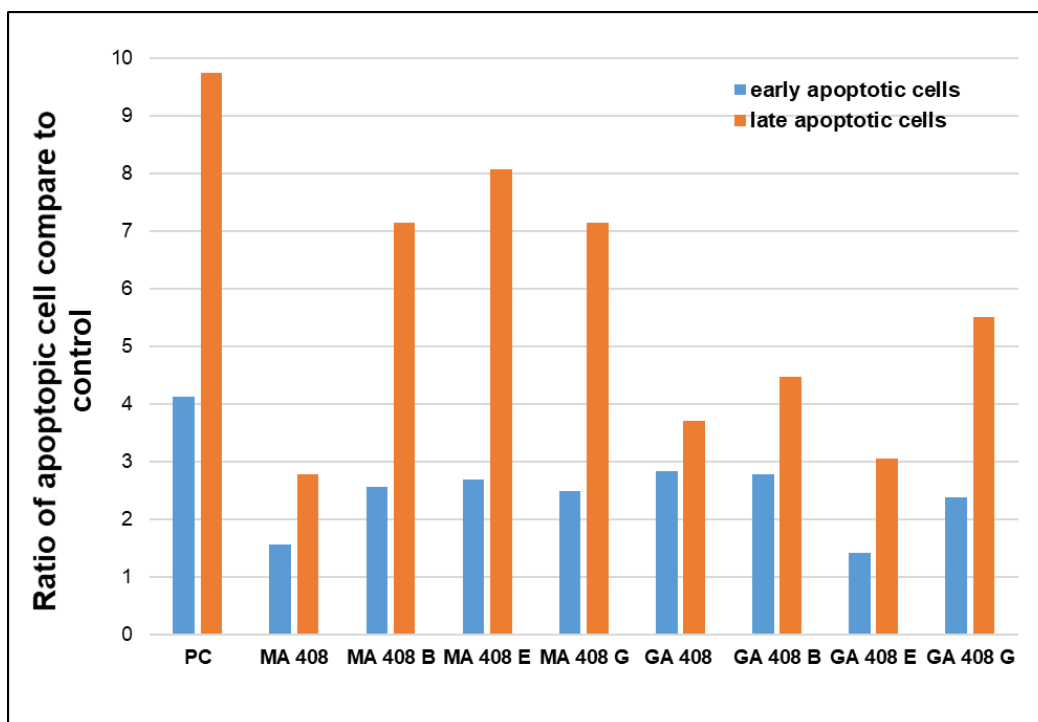

**S13. Figure: Results of cytotoxicity measurements of HEK 293 cell lines.** The ratio of apoptotic cells was calculated to the untreated sample. The concentration of hydrogels were 0.1 mg/ml. PC: positive control (3 V/V% DMOS solution). B: baicalin. E: emodin. G: glycyrrhizic acid.

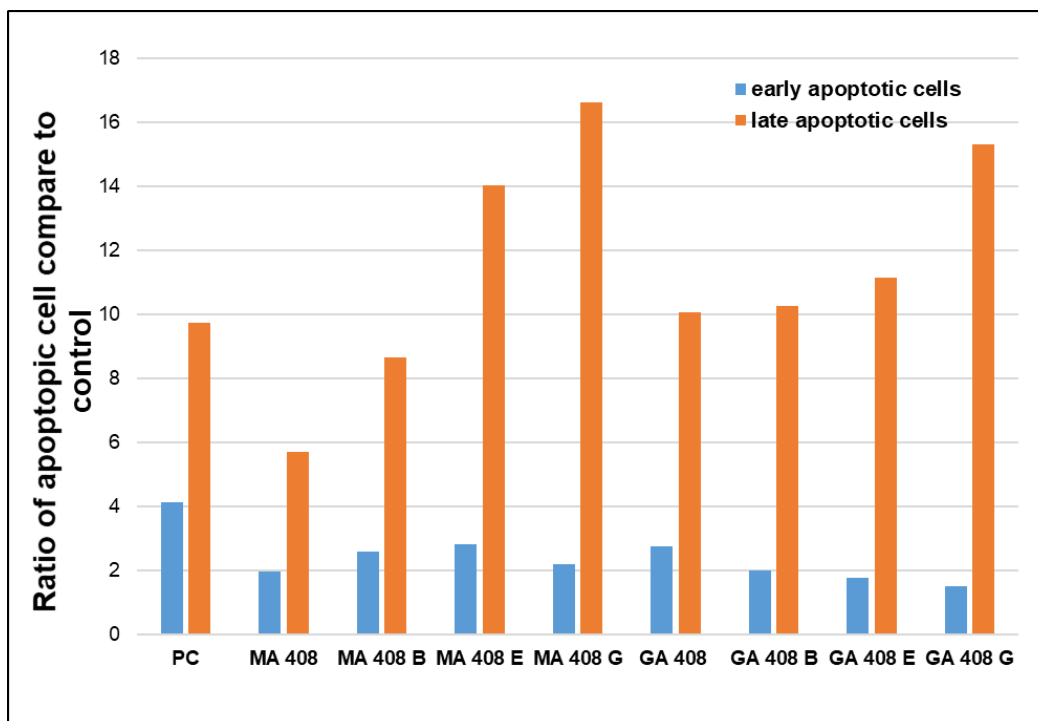

**S14. Figure: Results of cytotoxicity measurements of HEK 293 cell lines.** The ratio of apoptotic cells was calculated to the untreated sample. The concentration of hydrogels were 10 mg/ml. PC: positive control (3 V/V% DMOS solution). B: baicalin. E: emodin. G: glycyrrhizic acid.
